# Supplementary material
Source: ML conference proceedings conference paper supplement (https://openaccess.thecvf.com/content/ICCV2023/html/Zhang_GO-SLAM_Global_Optimization_ICCV_2023_paper.html)
Supplement: Supplementary file 1 [file Zhang_GO-SLAM_Global_Optimization_ICCV_2023_supplemental.pdf]

# GO-SLAM: Global Optimization for Consistent 3D Instant Reconstruction

## – Supplementary Material

Youmin Zhang      Fabio Tosi      Stefano Mattocchia      Matteo Poggi

Department of Computer Science and Engineering (DISI)

University of Bologna, Italy

{youmin.zhang2, fabio.tosi5, stefano.mattocchia, m.poggi}@unibo.it

<https://youmi-zym.github.io/projects/GO-SLAM/>

### A. SLAM Configuration

#### A.1. Rendering Network Details.

**Architecture.** Our rendering networks consist of one SDF network and one color network as shown in Fig. A. For multi-resolution hash encodings, we set the feature dimensions and maximum entries per level to 2 and  $2^{19}$  respectively. Totally, there are 16 levels of different resolutions ranging from 16 to 4096. The size of hidden units in the SDF network and color network are 32 and 64 respectively.

**Training.** We use AdamW [4] as optimizer. The learning rate is set to  $10^{-2}$  for learnable hash encodings and  $10^{-3}$  for parameters of the SDF network and color network.

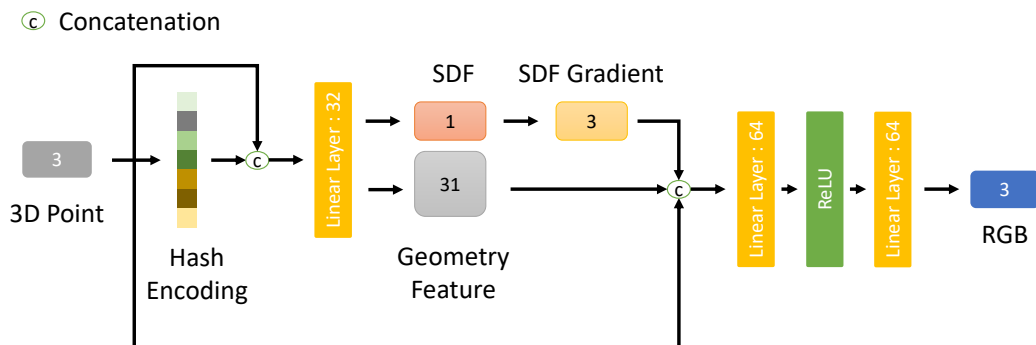

Figure A: Details of rendering networks.

### B. More Qualitative Results

We provide detailed results on ScanNet [3], EuRoC [1] and Replica [5] datasets on Figs. B to D respectively.

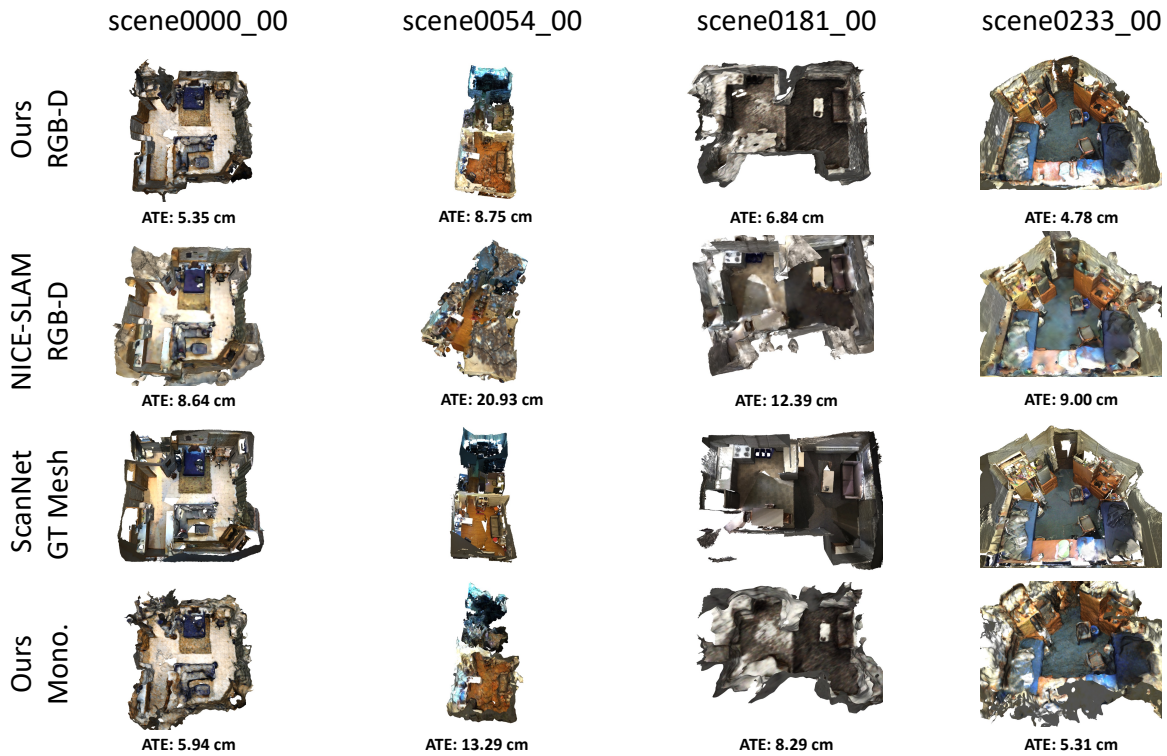

Figure B: **Qualitative results on ScanNet dataset [5].** Our GO-SLAM predicts globally consistent 3D reconstruction with monocular or RGB-D input at real-time speed. While NICE-SLAM [7] suffers from accumulated errors in trajectory and distortion in 3D models.

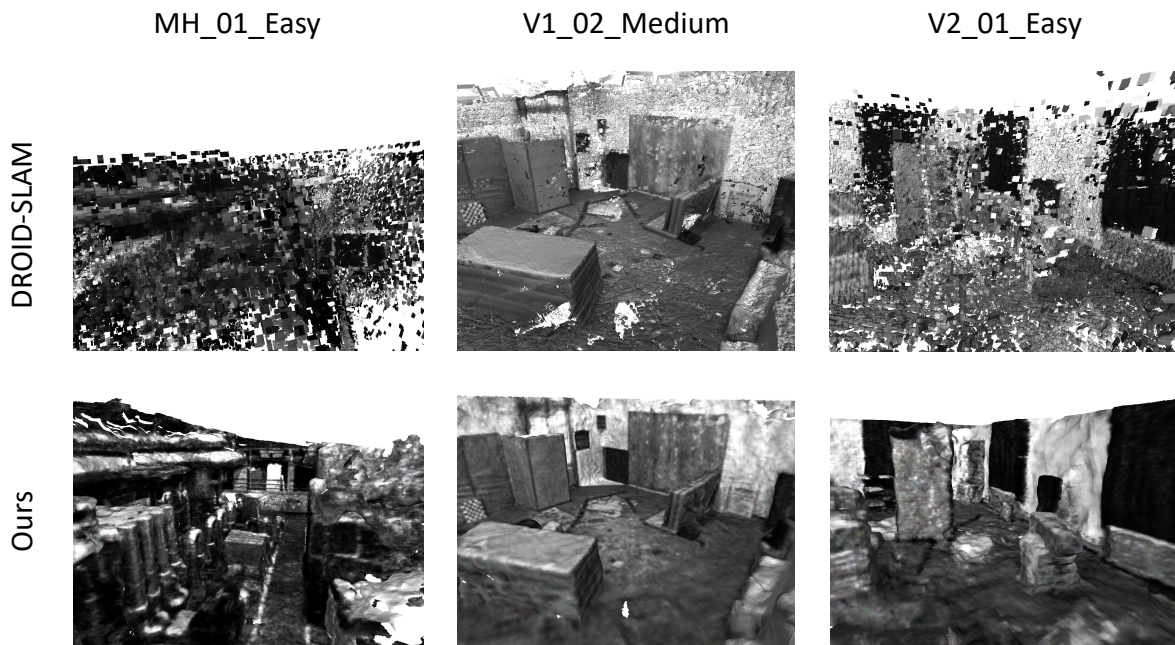

Figure C: **Qualitative results on EuRoC dataset [1].** DROID-SLAM [6] reconstructions obtained with TSDF-Fusion [2]. Compared to DROID-SLAM, our reconstructions are much cleaner and more complete.

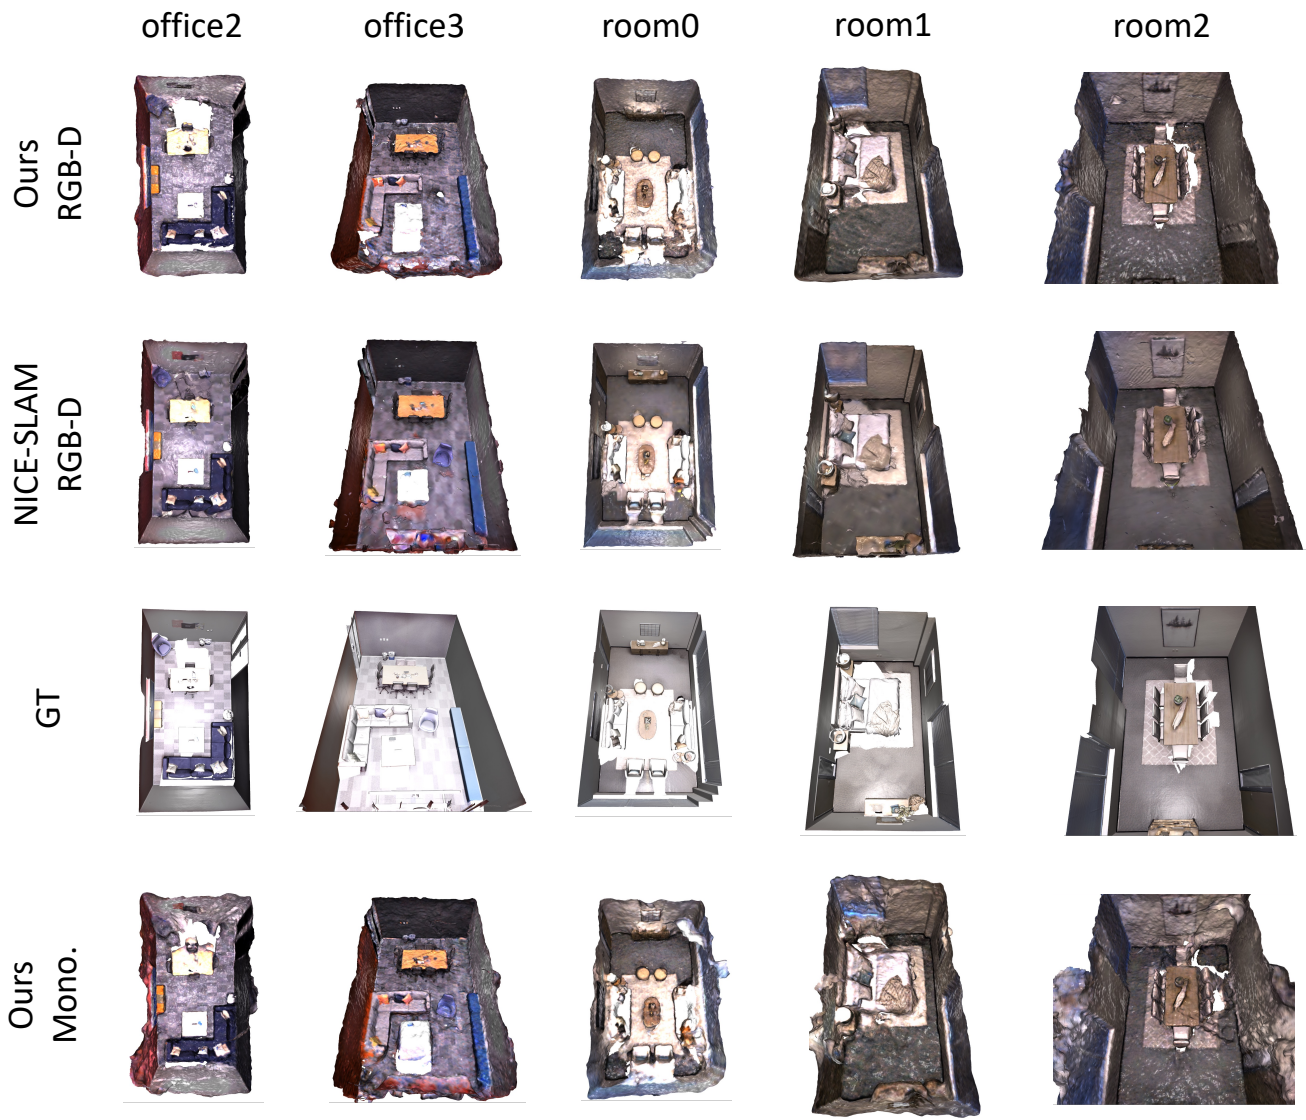

Figure D: **Qualitative results on Replica dataset [5].** Our GO-SLAM predicts dense 3D reconstruction with monocular or RGB-D input at real-time speed. While NICE-SLAM [7], which can only work with depth input, takes hours ( $\ll 1$  FPS) to get the reconstruction.

## References

- [1] Michael Burri, Janosch Nikolic, Pascal Gohl, Thomas Schneider, Joern Rehder, Sammy Omari, Markus W Achtelik, and Roland Siegwart. The euroc micro aerial vehicle datasets. *IJRR*, 35(10):1157–1163, 2016. [1](#), [2](#)
- [2] Brian Curless and Marc Levoy. A volumetric method for building complex models from range images. In *SIGGRAPH*, pages 303–312, 1996. [2](#)
- [3] Angela Dai, Angel X Chang, Manolis Savva, Maciej Halber, Thomas Funkhouser, and Matthias Nießner. Scannet: Richly-annotated 3d reconstructions of indoor scenes. In *CVPR*, pages 5828–5839, 2017. [1](#)
- [4] Ilya Loshchilov and Frank Hutter. Decoupled weight decay regularization. *arXiv preprint arXiv:1711.05101*, 2017. [1](#)
- [5] Julian Straub, Thomas Whelan, Lingni Ma, Yufan Chen, Erik Wijmans, Simon Green, Jakob J Engel, Raul Mur-Artal, Carl Ren, Shobhit Verma, et al. The replica dataset: A digital replica of indoor spaces. *arXiv preprint arXiv:1906.05797*, 2019. [1](#), [2](#), [3](#)
- [6] Zachary Teed and Jia Deng. Droid-slam: Deep visual slam for monocular, stereo, and rgb-d cameras. *NeurIPS*, 34:16558–16569, 2021. [2](#)
- [7] Zihan Zhu, Songyou Peng, Viktor Larsson, Weiwei Xu, Hujun Bao, Zhaopeng Cui, Martin R Oswald, and Marc Pollefeys. Nice-slam: Neural implicit scalable encoding for slam. In *CVPR*, pages 12786–12796, 2022. [2](#), [3](#)
